# Supplementary material for: Mapping malaria incidence distribution that accounts for environmental factors in Maputo Province - Mozambique
Source: Springer Nature journal article supplement (doi:10.1186/1475-2875-9-79), 2010-03-21

(samples) means RR Summer 2002

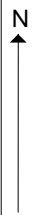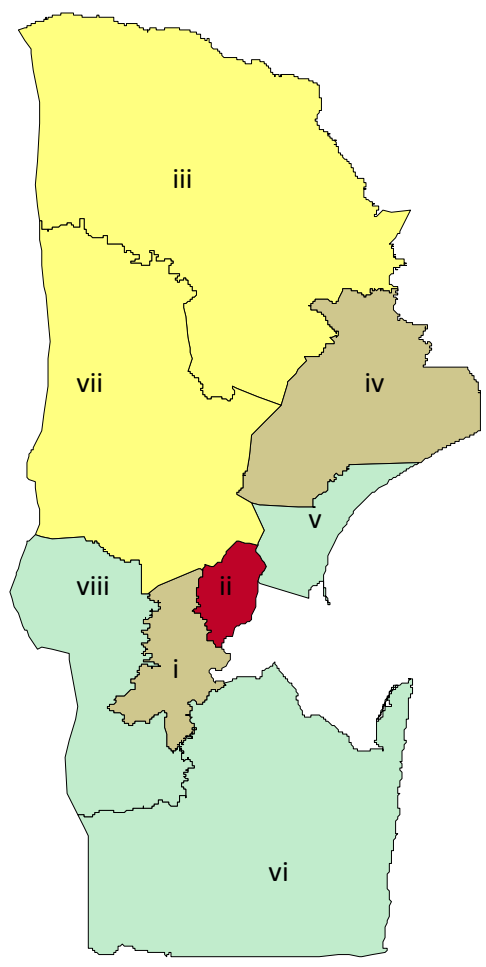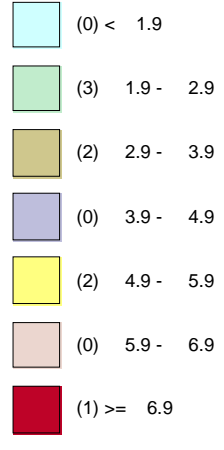

- Legend:
- i-Boane
  - ii-Matola
  - iii-Magude
  - iv-Manhiça
  - v-Marracuene
  - vi-Matutuine
  - vii-Moamba
  - viii-Namaacha

5.00E-4km

(samples) means structured effect Summer 2002

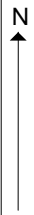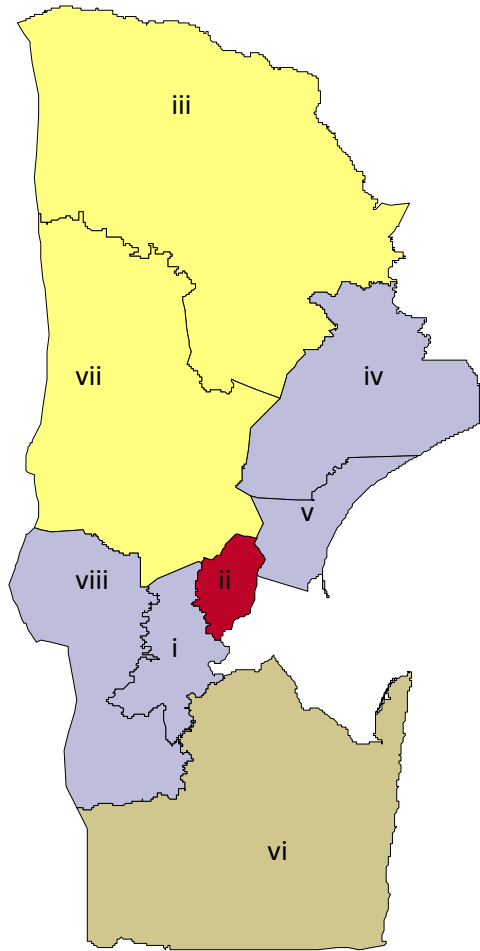

5.00E-4km

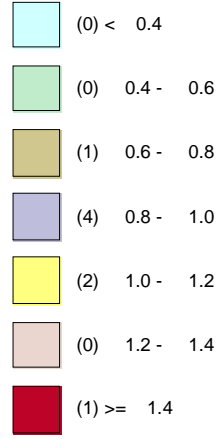

Legend:

i-Boane

ii-Matola

iii-Magude

iv-Manhiça

v-Marracuene

vi-Matutuine

vii-Moamba

viii-Namaacha

(samples) means unstructured effect Summer 2002

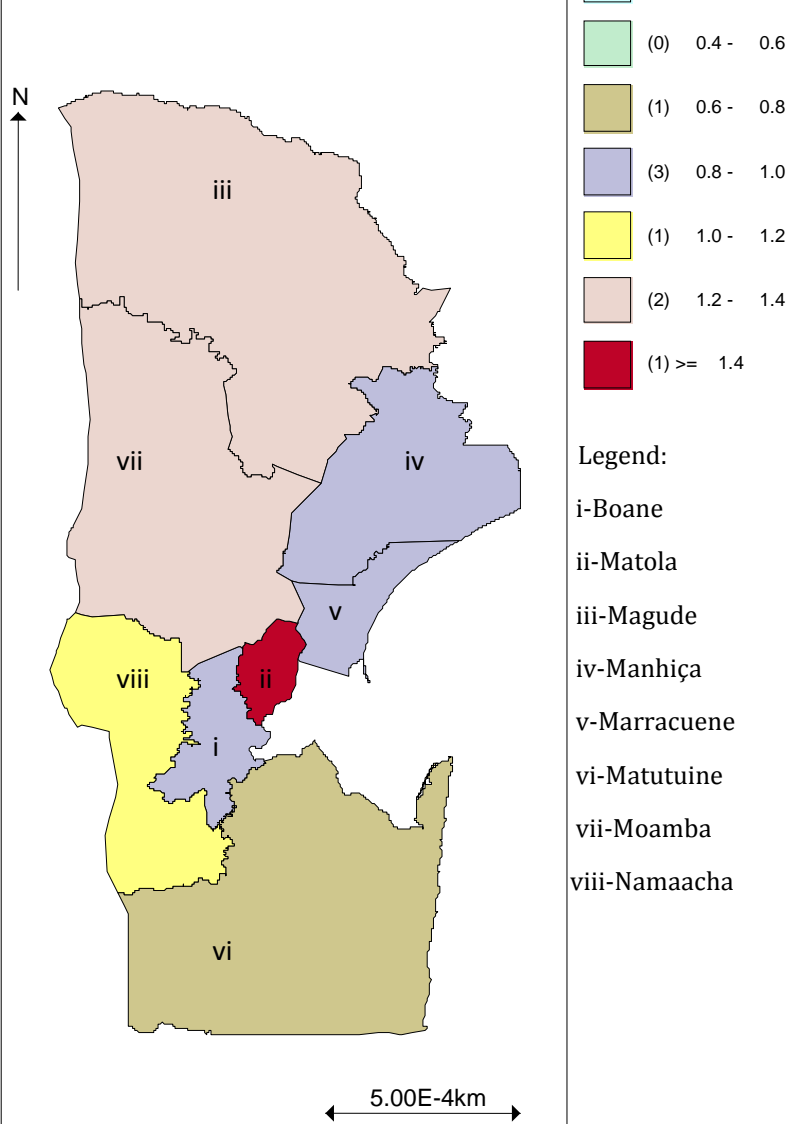

Supplement: Additional file 3 [file 1475-2875-9-79-s3.pdf]
